# Supplementary material for: Assessment of Dynamic Changes in Stressed Volume and Venous Return during Hyperdynamic Septic Shock
Source: MDPI journal article supplement (doi:10.3390/jpm12050724), 2022-04-29
Supplement: s1 [file s1]

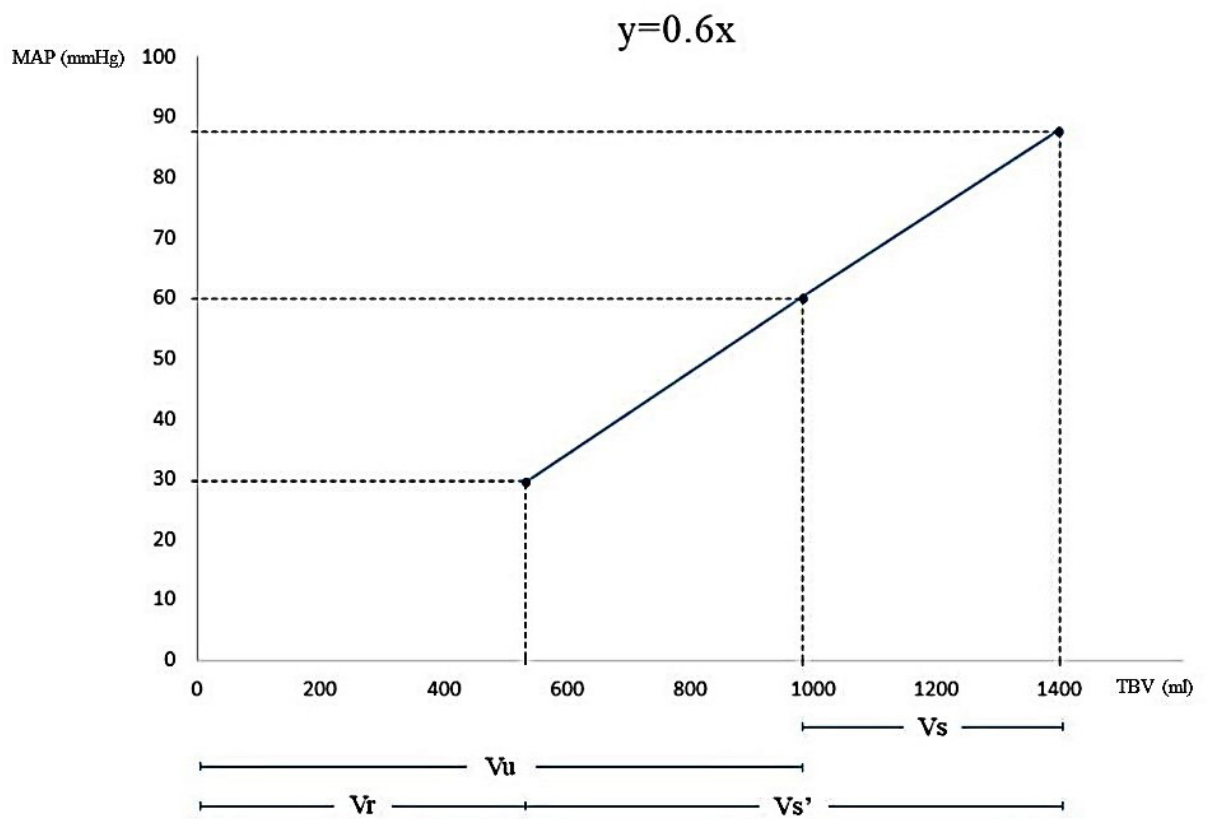

**Figure S1.** Total blood volume in a 20 kg-swine.

$V_s$ , stressed volume;  $V_u$ , unstressed volume;  $V_r$ , rest volume  $V_{s'}$ , volume that can mobilized for the splanchnic and other compliant veins. Data are derived from reference 15.
