# Supplementary material for: Assessment of Dynamic Changes in Stressed Volume and Venous Return during Hyperdynamic Septic Shock
Source: MDPI journal article supplement (doi:10.3390/jpm12050724), 2022-04-29
Supplement: s1 [file s1]

**Table S1. Metabolic changes of animals during progression of sepsis and septic shock**

|                                          | Baseline     | 0              | 1 h            | 2 h           | 3 h          | 4 h            | 5 h            | 6 h            | p-value |
|------------------------------------------|--------------|----------------|----------------|---------------|--------------|----------------|----------------|----------------|---------|
| SpO <sub>2</sub> (%)                     | 94.1 (3.8)   | 93.7 (4.4)     | 90.2 (3.6)     | 89.9 (4.7)    | 86.3 (5.5)   | 83.8 (5.4)     | 83.2 (4.8)     | 78.5 (3.4)     | 0.026   |
| ETCO <sub>2</sub> (mmHg)                 | 40.2 (4.65)  | 33.41 (1.14)   | 32.1 (3.39)    | 30.4 (2.79)   | 26.23 (5.01) | 24.52 (4.35)   | 26.53 (2.12)   | 26.14 (2.82)   | 0.001   |
| pH                                       | 7.44 (0.06)  | 7.43 (0.08)    | 7.42 (0.06)    | 7.28 (0.1)    | 7.06 (0.2)   | 7.08 (0.22)    | 7.04 (0.13)    | 7.05 (0.17)    | 0.031   |
| PaO <sub>2</sub> (mmHg)                  | 92.78 (4.76) | 93.38 (3.52)   | 90.82 (2.72)   | 70.64 (5.84)  | 69.32 (5.44) | 64.1 (3.88)    | 54.3 (6.39)    | 49.6 (6.56)    | 0.001   |
| PaCO <sub>2</sub> (mmHg)                 | 39.56 (1.22) | 39.64 (1.58)   | 39.94 (2.37)   | 44.86 (4.78)  | 42.46 (5.45) | 43.6 (4.36)    | 45.3 (5.32)    | 71.62 (7.89)   | 0.001   |
| PaO <sub>2</sub> /FiO <sub>2</sub>       | 441.8 (22.6) | 444.66 (16.76) | 432.47 (12.95) | 336.38 (27.8) | 330.1 (25.9) | 305.23 (18.47) | 258.57 (30.42) | 236.19 (31.23) | <0.001  |
| HCO <sub>3</sub> (mmol·L <sup>-1</sup> ) | 27.32 (3.79) | 28.7 (1.78)    | 31.74 (1.47)   | 30.1 (1.6)    | 23.72 (1.26) | 25.5 (1.78)    | 20.34 (1.65)   | 19.1 (1.63)    | 0.001   |
| EB (mmol·L <sup>-1</sup> )               | 4.98 (3.53)  | 5.1 (2.23)     | 3.1 (1.78)     | 1.92 (1.12)   | -1.52 (1.32) | -1.66 (1.80)   | -6.7 (1.44)    | -11.5 (1.45)   | 0.001   |
| Lactate (mmol·L <sup>-1</sup> )          | 0.9 (0.02)   | 0.8 (0.24)     | 0.9 (0.12)     | 2.2 (0.3)     | 2.9 (0.5)    | 3.5 (0.2)      | 4.2 (0.4)      | 5.1 (0.5)      | 0.03    |

Values are in mean (SD).

SpO<sub>2</sub> = oxygen saturation of hemoglobin, ETCO<sub>2</sub> = end-tidal carbon dioxide, PaO<sub>2</sub> = partial arterial oxygen pressure, PaCO<sub>2</sub> = partial arterial carbon dioxide pressure.
