# Supplementary material for: Assessment of Dynamic Changes in Stressed Volume and Venous Return during Hyperdynamic Septic Shock
Source: MDPI journal article supplement (doi:10.3390/jpm12050724), 2022-04-29
Supplement: s1 [file s1]

**Table S2. Mean circulatory filling pressure after cardiac arrest**

| <b>Time after cardiac arrest</b> | <b>Mean (mmHg)</b> | <b>SD (mmHg)</b> |
|----------------------------------|--------------------|------------------|
| 5-7.5 seconds                    | 15.09              | 1.86             |
| 15-17.5 seconds                  | 14.73              | 1.85             |
| 25-27.5 seconds                  | 14.9               | 1.79             |
| 35-37.5 seconds                  | 14.7               | 1.37             |
| 45-47.5 seconds                  | 14.53              | 1.12             |
| 55-57.5 seconds                  | 14.54              | 0.86             |

The differences between time points were not statistically significant.
